# Supplementary material for: Time‐, Sex‐, and Dose‐Dependent Alterations of the Gut Microbiota by Consumption of Dietary Daikenchuto (TU‐100)
Source: Hindawi journal article supplement (doi:10.1155/2018/7415975), 2018-01-01
Supplement: f1 [file 7415975.f1.pdf]

# Supplementary Figure 1

**A**

## Experiment 1 and 2: Male samples at Week 0

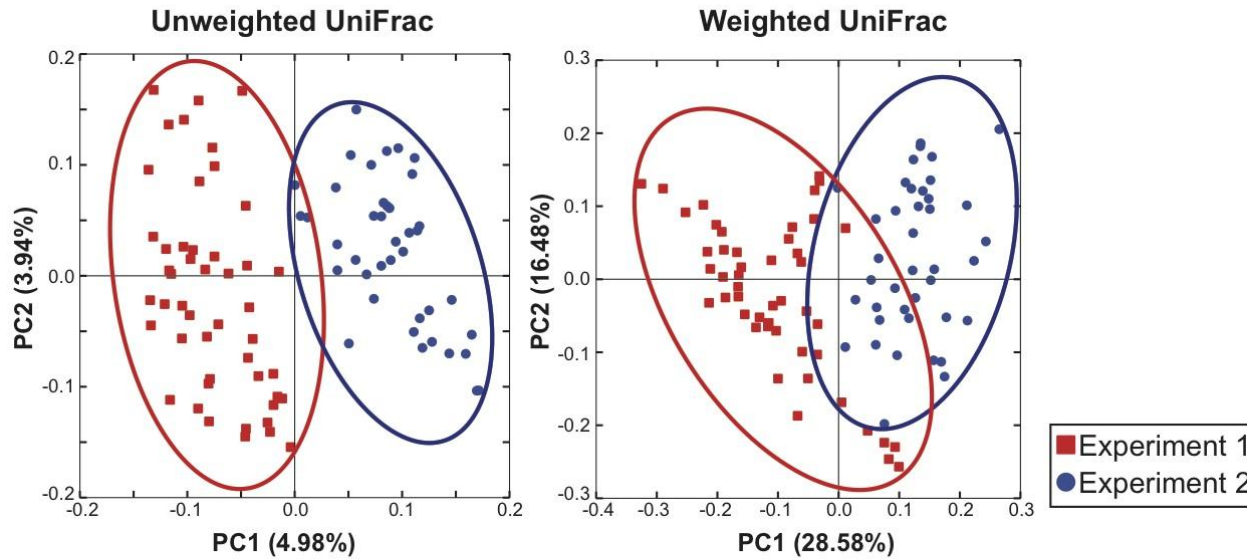

**B**

## Phyla in Male samples

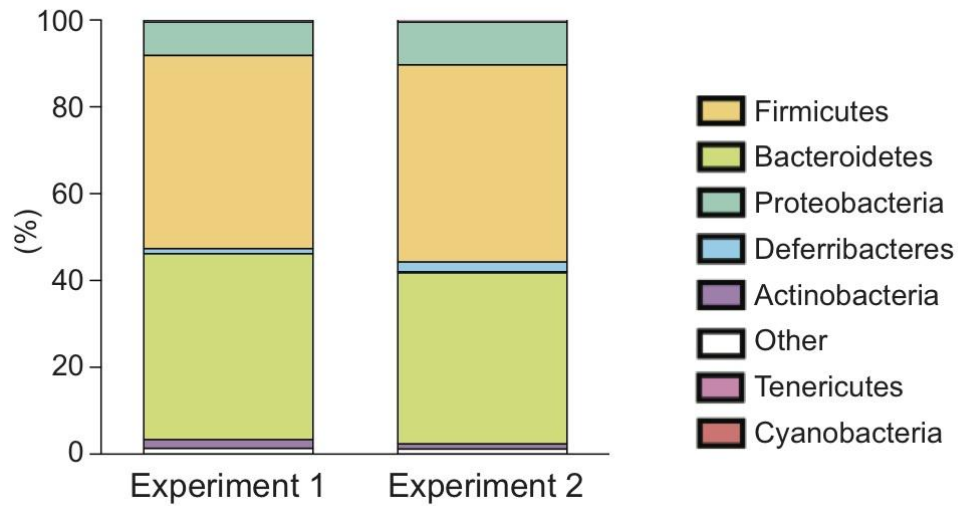

Supplementary Table 1. The OTUs with significant increase and decrease by 1.5% TU-100 administration for 24 weeks

**Female samples - Increased OTUs (top 20)**

| Taxonomy                                                                                                | P value* (G1vsG2) |
|---------------------------------------------------------------------------------------------------------|-------------------|
| k__Bacteria; p__Firmicutes; c__Clostridia; o__Clostridiales; f__Clostridiaceae; g__; s__                | 0.000628416       |
| k__Bacteria; p__Firmicutes; c__Clostridia; o__Clostridiales; f__; g__; s__                              | 0.000628416       |
| k__Bacteria; p__Firmicutes; c__Clostridia; o__Clostridiales; f__Clostridiaceae; g__; s__                | 0.000636299       |
| k__Bacteria; p__Firmicutes; c__Clostridia; o__Clostridiales; f__Lachnospiraceae; g__; s__               | 0.000817973       |
| k__Bacteria; p__Firmicutes; c__Clostridia; o__Clostridiales; f__Clostridiaceae; g__; s__                | 0.000956935       |
| k__Bacteria; p__Bacteroidetes; c__Bacteroidia; o__Bacteroidales; f__S24-7; g__; s__                     | 0.001506616       |
| k__Bacteria; p__Bacteroidetes; c__Bacteroidia; o__Bacteroidales; f__Rikenellaceae; g__; s__             | 0.001677644       |
| k__Bacteria; p__Firmicutes; c__Clostridia; o__Clostridiales; f__; g__; s__                              | 0.001861375       |
| k__Bacteria; p__Firmicutes; c__Clostridia; o__Clostridiales; f__; g__; s__                              | 0.002102622       |
| k__Bacteria; p__Bacteroidetes; c__Bacteroidia; o__Bacteroidales; f__S24-7; g__; s__                     | 0.002981194       |
| k__Bacteria; p__Firmicutes; c__Clostridia; o__Clostridiales; f__; g__; s__                              | 0.003059976       |
| k__Bacteria; p__Firmicutes; c__Clostridia; o__Clostridiales                                             | 0.003159791       |
| k__Bacteria; p__Firmicutes; c__Clostridia; o__Clostridiales; f__; g__; s__                              | 0.003351351       |
| k__Bacteria; p__Bacteroidetes; c__Bacteroidia; o__Bacteroidales; f__S24-7; g__; s__                     | 0.003951340       |
| k__Bacteria; p__Bacteroidetes; c__Bacteroidia; o__Bacteroidales; f__Rikenellaceae; g__; s__             | 0.003963742       |
| k__Bacteria; p__Firmicutes; c__Clostridia; o__Clostridiales; f__; g__; s__                              | 0.004036737       |
| k__Bacteria; p__Bacteroidetes; c__Bacteroidia; o__Bacteroidales; f__S24-7; g__; s__                     | 0.004036737       |
| k__Bacteria; p__Firmicutes; c__Bacilli; o__Turicibacterales; f__Turicibacteraceae; g__Turicibacter; s__ | 0.004469818       |
| k__Bacteria; p__Bacteroidetes; c__Bacteroidia; o__Bacteroidales; f__S24-7; g__; s__                     | 0.004638759       |
| k__Bacteria; p__Bacteroidetes; c__Bacteroidia; o__Bacteroidales; f__Rikenellaceae; g__; s__             | 0.005395294       |

\*Kruskal-Wallis test

**Female samples - Decreased OTUs (top 20)**

| Taxonomy                                                                                                                     | P value* (G1vsG2) |
|------------------------------------------------------------------------------------------------------------------------------|-------------------|
| k__Bacteria; p__Proteobacteria; c__Deltaproteobacteria; o__Desulfovibrionales; f__Desulfovibrionaceae; g__; s__              | 0.001054166       |
| k__Bacteria; p__Proteobacteria; c__Deltaproteobacteria; o__Desulfovibrionales; f__Desulfovibrionaceae; g__; s__              | 0.001193745       |
| k__Bacteria; p__Proteobacteria; c__Deltaproteobacteria; o__Desulfovibrionales; f__Desulfovibrionaceae; g__Desulfovibrio; s__ | 0.001348349       |
| k__Bacteria; p__Proteobacteria; c__Deltaproteobacteria; o__Desulfovibrionales; f__Desulfovibrionaceae; g__; s__              | 0.001780211       |
| k__Bacteria; p__Proteobacteria; c__Deltaproteobacteria; o__Desulfovibrionales; f__Desulfovibrionaceae; g__; s__              | 0.002001649       |
| k__Bacteria; p__Firmicutes; c__Clostridia; o__Clostridiales; f__; g__; s__                                                   | 0.002629815       |
| k__Bacteria; p__Firmicutes; c__Clostridia; o__Clostridiales; f__Lachnospiraceae; g__; s__                                    | 0.003777168       |
| k__Bacteria; p__Firmicutes; c__Clostridia; o__Clostridiales; f__; g__; s__                                                   | 0.004052727       |
| k__Bacteria; p__Firmicutes; c__Clostridia; o__Clostridiales; f__Lachnospiraceae; g__[Ruminococcus]; s__gnavus                | 0.005254493       |
| k__Bacteria; p__Firmicutes; c__Clostridia; o__Clostridiales; f__; g__; s__                                                   | 0.005606455       |
| k__Bacteria; p__Firmicutes; c__Clostridia; o__Clostridiales; f__Ruminococcaceae; g__; s__                                    | 0.007719174       |
| k__Bacteria; p__Proteobacteria; c__Deltaproteobacteria; o__Desulfovibrionales; f__Desulfovibrionaceae; g__Desulfovibrio; s__ | 0.008724379       |
| k__Bacteria; p__Firmicutes; c__Clostridia; o__Clostridiales; f__; g__; s__                                                   | 0.01181794        |
| k__Bacteria; p__Firmicutes; c__Clostridia; o__Clostridiales; f__Ruminococcaceae; g__Oscillospira; s__                        | 0.014460697       |
| k__Bacteria; p__Proteobacteria; c__Deltaproteobacteria; o__Desulfovibrionales; f__Desulfovibrionaceae; g__; s__              | 0.016827409       |
| k__Bacteria; p__Firmicutes; c__Clostridia; o__Clostridiales; f__; g__; s__                                                   | 0.016827409       |

|                                                                                                                  |             |
|------------------------------------------------------------------------------------------------------------------|-------------|
| k__Bacteria; p__Proteobacteria; c__Deltaproteobacteria; o__Desulfovibrionales; f__Desulfovibrionaceae; g__ ; s__ | 0.017319383 |
| k__Bacteria; p__Firmicutes; c__Clostridia; o__Clostridiales; f__ ; g__ ; s__                                     | 0.017571067 |
| k__Bacteria; p__Firmicutes; c__Clostridia; o__Clostridiales; f__Ruminococcaceae; g__ ; s__                       | 0.018102455 |
| k__Bacteria; p__Bacteroidetes; c__Bacteroidia; o__Bacteroidales; f__S24-7; g__ ; s__                             | 0.023103394 |

\*Kruskal-Wallis test

### Male samples - Increased OTUs (top 20)

| Taxonomy                                                                                                                     | P value* (G1vsG2) |
|------------------------------------------------------------------------------------------------------------------------------|-------------------|
| k__Bacteria; p__Actinobacteria; c__Coriobacteriia; o__Coriobacteriales; f__Coriobacteriaceae; g__ ; s__                      | 0.000828873       |
| k__Bacteria; p__Firmicutes; c__Erysipelotrichi; o__Erysipelotrichales; f__Erysipelotrichaceae; g__Allobaculum; s__           | 0.001455520       |
| k__Bacteria; p__Firmicutes; c__Clostridia; o__Clostridiales; f__ ; g__ ; s__                                                 | 0.001625220       |
| k__Bacteria; p__Bacteroidetes; c__Bacteroidia; o__Bacteroidales; f__Rikenellaceae; g__ ; s__                                 | 0.001644824       |
| k__Bacteria; p__Firmicutes; c__Clostridia; o__Clostridiales; f__ ; g__ ; s__                                                 | 0.001644824       |
| k__Bacteria; p__Firmicutes; c__Erysipelotrichi; o__Erysipelotrichales; f__Erysipelotrichaceae; g__Allobaculum; s__           | 0.001862165       |
| k__Bacteria; p__Tenericutes; c__Mollicutes; o__Anaeroplasmatales; f__Anaeroplasmataceae; g__Anaeroplasma; s__                | 0.002108500       |
| k__Bacteria; p__Firmicutes; c__Erysipelotrichi; o__Erysipelotrichales; f__Erysipelotrichaceae; g__Allobaculum; s__           | 0.002675786       |
| k__Bacteria; p__Firmicutes; c__Erysipelotrichi; o__Erysipelotrichales; f__Erysipelotrichaceae; g__Allobaculum; s__           | 0.002773451       |
| k__Bacteria; p__Firmicutes; c__Bacilli; o__Lactobacillales; f__Lactobacillaceae; g__Lactobacillus; s__                       | 0.002924386       |
| k__Bacteria; p__Proteobacteria; c__Betaproteobacteria; o__Burkholderiales; f__ ; g__ ; s__                                   | 0.003092377       |
| k__Bacteria; p__Firmicutes; c__Erysipelotrichi; o__Erysipelotrichales; f__Erysipelotrichaceae; g__Allobaculum; s__           | 0.003321031       |
| k__Bacteria; p__Firmicutes; c__Erysipelotrichi; o__Erysipelotrichales; f__Erysipelotrichaceae; g__Allobaculum; s__           | 0.005948559       |
| k__Bacteria; p__Firmicutes; c__Erysipelotrichi; o__Erysipelotrichales; f__Erysipelotrichaceae; g__Allobaculum; s__           | 0.007643524       |
| k__Bacteria; p__Firmicutes; c__Erysipelotrichi; o__Erysipelotrichales; f__Erysipelotrichaceae; g__Allobaculum; s__           | 0.008150972       |
| k__Bacteria; p__Firmicutes; c__Erysipelotrichi; o__Erysipelotrichales; f__Erysipelotrichaceae; g__Allobaculum; s__           | 0.008563666       |
| k__Bacteria; p__Bacteroidetes; c__Bacteroidia; o__Bacteroidales; f__Prevotellaceae; g__Prevotella; s__                       | 0.009057888       |
| k__Bacteria; p__Proteobacteria; c__Deltaproteobacteria; o__Desulfovibrionales; f__Desulfovibrionaceae; g__Desulfovibrio; s__ | 0.009600749       |
| k__Bacteria; p__Firmicutes; c__Erysipelotrichi; o__Erysipelotrichales; f__Erysipelotrichaceae; g__Allobaculum; s__           | 0.010555302       |
| Unassigned                                                                                                                   | 0.011410283       |

\*Kruskal-Wallis test

### Male samples - Decreased OTUs (top 20)

| Taxonomy                                                                                                      | P value* (G1vsG2) |
|---------------------------------------------------------------------------------------------------------------|-------------------|
| Unassigned                                                                                                    | 0.001045853       |
| k__Bacteria; p__Firmicutes; c__Clostridia; o__Clostridiales; f__ ; g__ ; s__                                  | 0.001644824       |
| k__Bacteria; p__Bacteroidetes; c__Bacteroidia; o__Bacteroidales; f__S24-7; g__ ; s__                          | 0.001745119       |
| k__Bacteria; p__Firmicutes; c__Clostridia; o__Clostridiales; f__Lachnospiraceae; g__[Ruminococcus]; s__gnavus | 0.003670617       |
| k__Bacteria; p__Firmicutes; c__Clostridia; o__Clostridiales; f__Ruminococcaceae; g__Oscillospira; s__         | 0.007200651       |
| k__Bacteria; p__Firmicutes; c__Clostridia; o__Clostridiales; f__ ; g__ ; s__                                  | 0.008010122       |
| k__Bacteria; p__Bacteroidetes; c__Bacteroidia; o__Bacteroidales; f__S24-7; g__ ; s__                          | 0.008150972       |
| k__Bacteria; p__Firmicutes; c__Clostridia; o__Clostridiales; f__ ; g__ ; s__                                  | 0.008750216       |
| k__Bacteria; p__Firmicutes; c__Clostridia; o__Clostridiales; f__Clostridiaceae                                | 0.008750216       |
| k__Bacteria; p__Firmicutes; c__Clostridia; o__Clostridiales; f__Lachnospiraceae; g__ ; s__                    | 0.009161627       |
| k__Bacteria; p__Firmicutes; c__Clostridia; o__Clostridiales; f__ ; g__ ; s__                                  | 0.009596760       |
| k__Bacteria; p__Tenericutes; c__Mollicutes; o__Mycoplasmatales; f__Mycoplasmataceae; g__ ; s__                | 0.013688169       |
| k__Bacteria; p__Firmicutes; c__Clostridia; o__Clostridiales; f__ ; g__ ; s__                                  | 0.014529532       |

|                                                                                                         |             |
|---------------------------------------------------------------------------------------------------------|-------------|
| k__Bacteria; p__Firmicutes; c__Bacilli; o__Turicibacterales; f__Turicibacteraceae; g__Turicibacter; s__ | 0.015624363 |
| k__Bacteria; p__Bacteroidetes; c__Bacteroidia; o__Bacteroidales; f__S24-7; g__; s__                     | 0.017833566 |
| k__Bacteria; p__Firmicutes; c__Clostridia; o__Clostridiales; f__Ruminococcaceae; g__; s__               | 0.019206777 |
| k__Bacteria; p__Firmicutes; c__Clostridia; o__Clostridiales; f__Ruminococcaceae; g__Oscillospira; s__   | 0.022586888 |
| k__Bacteria; p__Firmicutes; c__Clostridia; o__Clostridiales; f__; g__; s__                              | 0.022947809 |
| k__Bacteria; p__Firmicutes; c__Clostridia; o__Clostridiales; f__; g__; s__                              | 0.023755991 |
| k__Bacteria; p__Firmicutes; c__Clostridia; o__Clostridiales; f__Ruminococcaceae; g__Ruminococcus; s__   | 0.024547111 |

---

\*Kruskal-Wallis test

Supplementary Table 2. The OTUs with significant increase and decrease by 0.75% TU-100 administration for 24 weeks

**0.75% TU-100 for 24 weeks - Increased OTUs (top 20)**

| Taxonomy                                                                                                                    | P value*<br>(G1vsG3) |
|-----------------------------------------------------------------------------------------------------------------------------|----------------------|
| k__Bacteria; p__Firmicutes; c__Bacilli; o__Lactobacillales; f__Lactobacillaceae; g__Lactobacillus; s__                      | 0.00671770           |
| k__Bacteria; p__Firmicutes; c__Clostridia; o__Clostridiales; f__ ; g__ ; s__                                                | 0.00671770           |
| k__Bacteria; p__Firmicutes; c__Clostridia; o__Clostridiales; f__Lachnospiraceae; g__ ; s__                                  | 0.00700094           |
| k__Bacteria; p__Firmicutes; c__Clostridia; o__Clostridiales; f__ ; g__ ; s__                                                | 0.00729036           |
| k__Bacteria; p__Firmicutes; c__Clostridia; o__Clostridiales; f__Lachnospiraceae; g__ ; s__                                  | 0.00729036           |
| k__Bacteria; p__Firmicutes; c__Clostridia; o__Clostridiales; f__ ; g__ ; s__                                                | 0.00729036           |
| k__Bacteria; p__Firmicutes; c__Clostridia; o__Clostridiales; f__Ruminococcaceae; g__Oscillospira; s__                       | 0.00729036           |
| k__Bacteria; p__Proteobacteria; c__Epsilonproteobacteria; o__Campylobacteriales; f__Helicobacteraceae; g__Helicobacter; s__ | 0.01051525           |
| k__Bacteria; p__Bacteroidetes; c__Bacteroidia; o__Bacteroidales; f__S24-7; g__ ; s__                                        | 0.01086976           |
| k__Bacteria; p__Firmicutes; c__Clostridia; o__Clostridiales; f__Ruminococcaceae; g__Oscillospira; s__                       | 0.01311266           |
| k__Bacteria; p__Bacteroidetes; c__Bacteroidia; o__Bacteroidales; f__Rikenellaceae; g__ ; s__                                | 0.01390299           |
| k__Bacteria; p__Firmicutes; c__Clostridia; o__Clostridiales; f__ ; g__ ; s__                                                | 0.01417139           |
| k__Bacteria; p__Firmicutes; c__Bacilli; o__Lactobacillales; f__Streptococcaceae; g__Lactococcus; s__                        | 0.01430588           |
| k__Bacteria; p__Bacteroidetes; c__Bacteroidia; o__Bacteroidales; f__Rikenellaceae; g__ ; s__                                | 0.01430588           |
| k__Bacteria; p__Bacteroidetes; c__Bacteroidia; o__Bacteroidales; f__S24-7; g__ ; s__                                        | 0.01430588           |
| k__Bacteria; p__Bacteroidetes; c__Bacteroidia; o__Bacteroidales; f__Rikenellaceae; g__Rikenella; s__                        | 0.01430588           |
| k__Bacteria; p__Bacteroidetes; c__Bacteroidia; o__Bacteroidales; f__S24-7; g__ ; s__                                        | 0.01648450           |
| k__Bacteria; p__Firmicutes; c__Clostridia; o__Clostridiales; f__Lachnospiraceae; g__[Ruminococcus]; s__gnavus               | 0.01899597           |
| k__Bacteria; p__Firmicutes; c__Clostridia; o__Clostridiales; f__ ; g__ ; s__                                                | 0.01899597           |
| k__Bacteria; p__Bacteroidetes; c__Bacteroidia; o__Bacteroidales; f__S24-7; g__ ; s__                                        | 0.02365162           |

\*Kruskal-Wallis test

**0.75% TU-100 for 24 weeks - Decreased OTUs (all of 15 OTUs)**

| Taxonomy                                                                                                                    | P value*<br>(G1vsG3) |
|-----------------------------------------------------------------------------------------------------------------------------|----------------------|
| k__Bacteria; p__Actinobacteria; c__Coriobacteriia; o__Coriobacteriales; f__Coriobacteriaceae; g__ ; s__                     | 0.01051525           |
| k__Bacteria; p__Firmicutes; c__Clostridia; o__Clostridiales; f__ ; g__ ; s__                                                | 0.01122989           |
| k__Bacteria; p__Firmicutes; c__Clostridia; o__Clostridiales; f__Ruminococcaceae; g__Ruminococcus; s__                       | 0.01311266           |
| k__Bacteria; p__Firmicutes; c__Clostridia; o__Clostridiales; f__Ruminococcaceae; g__Oscillospira; s__                       | 0.01390299           |
| k__Bacteria; p__Firmicutes; c__Clostridia; o__Clostridiales; f__ ; g__ ; s__                                                | 0.01430588           |
| k__Bacteria; p__Firmicutes; c__Clostridia; o__Clostridiales; f__ ; g__ ; s__                                                | 0.01745104           |
| k__Bacteria; p__Bacteroidetes; c__Bacteroidia; o__Bacteroidales; f__S24-7; g__ ; s__                                        | 0.01945103           |
| k__Bacteria; p__Firmicutes; c__Clostridia; o__Clostridiales; f__ ; g__ ; s__                                                | 0.0218957            |
| k__Bacteria; p__Firmicutes; c__Clostridia; o__Clostridiales; f__Ruminococcaceae                                             | 0.02365162           |
| k__Bacteria; p__Firmicutes; c__Erysipelotrichi; o__Erysipelotrichales; f__Erysipelotrichaceae; g__Allobaculum; s__          | 0.03012682           |
| k__Bacteria; p__Bacteroidetes; c__Bacteroidia; o__Bacteroidales; f__S24-7; g__ ; s__                                        | 0.03012682           |
| k__Bacteria; p__Firmicutes; c__Clostridia; o__Clostridiales; f__Lachnospiraceae; g__[Ruminococcus]; s__gnavus               | 0.03576081           |
| k__Bacteria; p__Firmicutes; c__Clostridia; o__Clostridiales; f__Lachnospiraceae; g__[Ruminococcus]; s__gnavus               | 0.03576081           |
| k__Bacteria; p__Firmicutes; c__Clostridia; o__Clostridiales; f__ ; g__ ; s__                                                | 0.0388671            |
| k__Bacteria; p__Proteobacteria; c__Epsilonproteobacteria; o__Campylobacteriales; f__Helicobacteraceae; g__Helicobacter; s__ | 0.04909012           |

\*Kruskal-Wallis test

Supplementary Table 3. The OTUs with significant increase and decrease by 3.0% TU-100 administration for 24 weeks

**3.0% TU-100 for 24 weeks - Increased OTUs (top 20)**

| Taxonomy                                                                                                | P value*<br>(G1vsG5) |
|---------------------------------------------------------------------------------------------------------|----------------------|
| k__Bacteria; p__Bacteroidetes; c__Bacteroidia; o__Bacteroidales; f__Bacteroidaceae; g__Bacteroides; s__ | 0.00467773           |
| k__Bacteria; p__Firmicutes; c__Clostridia; o__Clostridiales; f__; g__; s__                              | 0.00616990           |
| k__Bacteria; p__Firmicutes; c__Clostridia; o__Clostridiales; f__Ruminococcaceae; g__Ruminococcus; s__   | 0.00700094           |
| k__Bacteria; p__Firmicutes; c__Clostridia; o__Clostridiales; f__; g__; s__                              | 0.00700094           |
| k__Bacteria; p__Firmicutes; c__Clostridia; o__Clostridiales; f__; g__; s__                              | 0.00700094           |
| k__Bacteria; p__Firmicutes; c__Clostridia; o__Clostridiales; f__; g__; s__                              | 0.00700094           |
| k__Bacteria; p__Bacteroidetes; c__Bacteroidia; o__Bacteroidales; f__Bacteroidaceae; g__Bacteroides; s__ | 0.00700094           |
| k__Bacteria; p__Bacteroidetes; c__Bacteroidia; o__Bacteroidales; f__S24-7; g__; s__                     | 0.00729036           |
| k__Bacteria; p__Firmicutes; c__Clostridia; o__Clostridiales; f__Ruminococcaceae; g__Oscillospira; s__   | 0.00729036           |
| k__Bacteria; p__Bacteroidetes; c__Bacteroidia; o__Bacteroidales; f__Rikenellaceae; g__; s__             | 0.00729036           |
| k__Bacteria; p__Firmicutes; c__Clostridia; o__Clostridiales; f__; g__; s__                              | 0.01016640           |
| k__Bacteria; p__Bacteroidetes; c__Bacteroidia; o__Bacteroidales; f__Rikenellaceae; g__; s__             | 0.01051525           |
| k__Bacteria; p__Firmicutes; c__Clostridia; o__Clostridiales; f__; g__; s__                              | 0.01051525           |
| k__Bacteria; p__Firmicutes; c__Clostridia; o__Clostridiales; f__; g__; s__                              | 0.01051525           |
| k__Bacteria; p__Firmicutes; c__Clostridia; o__Clostridiales; f__; g__; s__                              | 0.01051525           |
| k__Bacteria; p__Bacteroidetes; c__Bacteroidia; o__Bacteroidales; f__S24-7; g__; s__                     | 0.01051525           |
| k__Bacteria; p__Bacteroidetes; c__Bacteroidia; o__Bacteroidales; f__Rikenellaceae; g__; s__             | 0.01234336           |
| k__Bacteria; p__Bacteroidetes; c__Bacteroidia; o__Bacteroidales; f__S24-7; g__; s__                     | 0.01350523           |
| k__Bacteria; p__Bacteroidetes; c__Bacteroidia; o__Bacteroidales; f__S24-7; g__; s__                     | 0.01390299           |
| k__Bacteria; p__Bacteroidetes; c__Bacteroidia; o__Bacteroidales; f__Bacteroidaceae; g__Bacteroides; s__ | 0.01430588           |

\*Kruskal-Wallis test

**3.0% TU-100 for 24 weeks - Decreased OTUs (top 20)**

| Taxonomy                                                                                                                     | P value*<br>(G1vsG5) |
|------------------------------------------------------------------------------------------------------------------------------|----------------------|
| k__Bacteria; p__Firmicutes; c__Clostridia; o__Clostridiales; f__; g__; s__                                                   | 0.00915440           |
| k__Bacteria; p__Firmicutes; c__Clostridia; o__Clostridiales; f__; g__; s__                                                   | 0.00982327           |
| k__Bacteria; p__Actinobacteria; c__Coriobacteriia; o__Coriobacteriales; f__Coriobacteriaceae; g__; s__                       | 0.01051525           |
| k__Bacteria; p__Bacteroidetes; c__Bacteroidia; o__Bacteroidales; f__[Odoribacteraceae]; g__Odoribacter; s__                  | 0.01051525           |
| k__Bacteria; p__Firmicutes; c__Clostridia; o__Clostridiales; f__; g__; s__                                                   | 0.01272535           |
| k__Bacteria; p__Firmicutes; c__Erysipelotrichi; o__Erysipelotrichales; f__Erysipelotrichaceae; g__Allobaculum; s__           | 0.01272535           |
| k__Bacteria; p__Firmicutes; c__Clostridia; o__Clostridiales; f__Lachnospiraceae; g__[Ruminococcus]; s__gnavus                | 0.01390299           |
| k__Bacteria; p__Bacteroidetes; c__Bacteroidia; o__Bacteroidales; f__S24-7; g__; s__                                          | 0.01430588           |
| k__Bacteria; p__Firmicutes; c__Clostridia; o__Clostridiales; f__; g__; s__                                                   | 0.01696491           |
| k__Bacteria; p__Proteobacteria; c__Deltaproteobacteria; o__Desulfovibrionales; f__Desulfovibrionaceae; g__Desulfovibrio; s__ | 0.02494664           |
| k__Bacteria; p__Firmicutes; c__Clostridia; o__Clostridiales; f__; g__; s__                                                   | 0.02620604           |
| k__Bacteria; p__Bacteroidetes; c__Bacteroidia; o__Bacteroidales; f__Porphyromonadaceae; g__Parabacteroides; s__              | 0.02748634           |
| k__Bacteria; p__Bacteroidetes; c__Bacteroidia; o__Bacteroidales; f__S24-7; g__; s__                                          | 0.02748634           |
| k__Bacteria; p__Bacteroidetes; c__Bacteroidia; o__Bacteroidales; f__S24-7; g__; s__                                          | 0.02845974           |
| k__Bacteria; p__Bacteroidetes; c__Bacteroidia; o__Bacteroidales; f__S24-7; g__; s__                                          | 0.02845974           |
| k__Bacteria; p__Proteobacteria; c__Deltaproteobacteria; o__Desulfovibrionales; f__Desulfovibrionaceae; g__; s__              | 0.02845974           |

|                                                                                                                    |            |
|--------------------------------------------------------------------------------------------------------------------|------------|
| k__Bacteria; p__Bacteroidetes; c__Bacteroidia; o__Bacteroidales; f__S24-7; g__ ; s__                               | 0.02845974 |
| k__Bacteria; p__Firmicutes; c__Erysipelotrichi; o__Erysipelotrichales; f__Erysipelotrichaceae; g__Allobaculum; s__ | 0.02845974 |
| k__Bacteria; p__Firmicutes; c__Clostridia; o__Clostridiales; f__ ; g__ ; s__                                       | 0.03097143 |
| k__Bacteria; p__Bacteroidetes; c__Bacteroidia; o__Bacteroidales; f__S24-7; g__ ; s__                               | 0.03097143 |

---

\*Kruskal-Wallis test
